# Supplementary material for: Aberrant expression of the microtubule-associated protein tau is an independent prognostic feature in prostate cancer
Source: Springer Nature journal article supplement (doi:10.1186/s12885-019-5390-1), 2019-03-01
Supplement: MOESM1 [file 16520528]

**Table S1** Pathological and clinical data of the arrayed prostate cancers

|                                   | <b>Study cohort on TMA<br/>(n= 17 747)</b> | <b>Biochemical relapse among<br/>category</b> |
|-----------------------------------|--------------------------------------------|-----------------------------------------------|
| <b>Follow-up</b>                  | 14 464                                     | 3 612 (25%)                                   |
| Mean/ median (month)              | 56.3 / 48.0                                | -                                             |
| <b>Age (y)</b>                    |                                            |                                               |
| ≤50                               | 433                                        | 66 (15%)                                      |
| 51-59                             | 4 341                                      | 839 (19%)                                     |
| 60-69                             | 9 977                                      | 2 073 (21%)                                   |
| ≥70                               | 2 936                                      | 634 (22%)                                     |
| <b>Pretreatment PSA (ng/ml)</b>   |                                            |                                               |
| <4                                | 2 225                                      | 313 (14%)                                     |
| 4-10                              | 10 520                                     | 1 696 (16%)                                   |
| 10-20                             | 3 662                                      | 1 043 (29%)                                   |
| >20                               | 1 231                                      | 545 (44%)                                     |
| <b>pT stage (AJCC 2002)</b>       |                                            |                                               |
| pT2                               | 11 518                                     | 1 212 (11%)                                   |
| pT3a                              | 3 842                                      | 1 121 (29%)                                   |
| pT3b                              | 2 233                                      | 1 213 (54%)                                   |
| pT4                               | 85                                         | 63 (74%)                                      |
| <b>Gleason grade</b>              |                                            |                                               |
| ≤3+3                              | 3 570                                      | 264 (7%)                                      |
| 3+4                               | 9 336                                      | 1 436 (15%)                                   |
| 3+4 Tertiary 5                    | 1 697                                      | 165 (10%)                                     |
| 4+3                               | 2 903                                      | 683 (24%)                                     |
| 4+3 Tertiary 5                    | 1 187                                      | 487 (41%)                                     |
| ≥4+4                              | 999                                        | 531 (53%)                                     |
| <b>Nodal (pN) stage</b>           |                                            |                                               |
| pN0                               | 10 636                                     | 2 243 (21%)                                   |
| pN+                               | 1 255                                      | 700 (56%)                                     |
| <b>Surgical margin (R) status</b> |                                            |                                               |
| Negative                          | 14 297                                     | 2 307 (16%)                                   |
| Positive                          | 3 388                                      | 1 304 (39%)                                   |

NOTE: Numbers do not always add up to 17 747 in the different categories because of cases with missing data. Abbreviation: AJCC, American Joint Committee on Cancer.

**Table S2** Association between microtubule-associated protein Tau (MAPT) staining results and prostate cancer phenotype in *ERG* fusion *negative* tumors

| Parameter                       | n evaluable | Tau          |         |          | p value |
|---------------------------------|-------------|--------------|---------|----------|---------|
|                                 |             | negative (%) | low (%) | high (%) |         |
| <b>All cancers</b>              | 4,207       | 96.5         | 3.3     | 0.2      |         |
| <b>Tumor stage</b>              |             |              |         |          |         |
| pT2                             | 2,792       | 97.9         | 1.9     | 0.1      | <0.0001 |
| pT3a                            | 864         | 94.8         | 5.2     | 0.0      |         |
| pT3b-pT4                        | 538         | 91.8         | 7.4     | 0.7      |         |
| <b>Gleason grade</b>            |             |              |         |          |         |
| ≤3+3                            | 794         | 98.5         | 1.4     | 0.1      | <0.0001 |
| 3+4                             | 2,242       | 97.4         | 2.6     | 0.0      |         |
| 3+4 Tert.5                      | 199         | 95.0         | 5.0     | 0.0      |         |
| 4+3                             | 465         | 94.0         | 5.8     | 0.2      |         |
| 4+3 Tert.5                      | 267         | 93.3         | 6.0     | 0.7      |         |
| ≥4+4                            | 237         | 91.6         | 7.2     | 1.3      |         |
| <b>Lymph node metastasis</b>    |             |              |         |          |         |
| N0                              | 2,498       | 95.8         | 4.0     | 0.2      | 0.0719  |
| N+                              | 249         | 92.8         | 6.4     | 0.8      |         |
| <b>Preop. PSA level (ng/ml)</b> |             |              |         |          |         |
| <4                              | 418         | 93.5         | 5.7     | 0.7      | 0.0005  |
| 4-10                            | 2,485       | 96.9         | 2.9     | 0.2      |         |
| 10-20                           | 933         | 97.5         | 2.5     | 0.0      |         |
| >20                             | 347         | 94.2         | 5.8     | 0.0      |         |
| <b>Surgical margin</b>          |             |              |         |          |         |
| negative                        | 3,321       | 96.7         | 3.1     | 0.2      | 0.3312  |
| positive                        | 874         | 95.7         | 4.1     | 0.2      |         |

**Table S3** Association between microtubule-associated protein Tau (MAPT) staining results and prostate cancer phenotype in *ERG* fusion *positive* tumors

| Parameter                       | n evaluable | Tau          |         |          | p value |
|---------------------------------|-------------|--------------|---------|----------|---------|
|                                 |             | negative (%) | low (%) | high (%) |         |
| <b>All cancers</b>              | 3,293       | 84.8         | 13.4    | 1.8      |         |
| <b>Tumor stage</b>              |             |              |         |          |         |
| pT2                             | 1,950       | 87.7         | 11.2    | 1.1      | <0.0001 |
| pT3a                            | 884         | 81.7         | 16.2    | 2.1      |         |
| pT3b-pT4                        | 447         | 78.5         | 17.4    | 4.0      |         |
| <b>Gleason grade</b>            |             |              |         |          |         |
| ≤3+3                            | 644         | 93.0         | 6.4     | 0.6      | <0.0001 |
| 3+4                             | 1,901       | 85.7         | 13.0    | 1.2      |         |
| 3+4 Tert.5                      | 102         | 75.5         | 21.6    | 2.9      |         |
| 4+3                             | 323         | 77.1         | 19.5    | 3.4      |         |
| 4+3 Tert.5                      | 189         | 74.1         | 19.6    | 6.3      |         |
| ≥4+4                            | 131         | 73.3         | 22.9    | 3.8      |         |
| <b>Lymph node metastasis</b>    |             |              |         |          |         |
| N0                              | 1,871       | 82.5         | 15.2    | 2.3      | 0.3988  |
| N+                              | 211         | 78.7         | 18.5    | 2.8      |         |
| <b>Preop. PSA level (ng/ml)</b> |             |              |         |          |         |
| <4                              | 451         | 83.1         | 14.4    | 2.4      | 0.2247  |
| 4-10                            | 2,030       | 86.1         | 12.3    | 1.6      |         |
| 10-20                           | 589         | 81.8         | 16.1    | 2.0      |         |
| >20                             | 198         | 84.8         | 13.6    | 1.5      |         |
| <b>Surgical margin</b>          |             |              |         |          |         |
| negative                        | 2,548       | 85.6         | 12.8    | 1.7      | 0.114   |
| positive                        | 732         | 82.4         | 15.6    | 2.0      |         |

**Table S4** Cox proportional hazards for PSA recurrence-free survival after prostatectomy of established preoperative prognostic parameter and MAPT expression

| Variable                              | Univariate analysis  | Multivariate analysis |
|---------------------------------------|----------------------|-----------------------|
| <b>Gleason grade biopsy</b>           |                      |                       |
| 3+4 vs. $\leq 3+3$                    | 2.20 (2.00-2.41) *** | 1.79 (1.59-2.00) ***  |
| 4+3 vs. 3+4                           | 1.85 (1.66-2.05) *** | 1.74 (1.54-1.97) ***  |
| $\geq 4+4$ vs. 4+3                    | 1.48 (1.32-1.66) *** | 1.33 (1.17-1.53) ***  |
| <b>cT-stage</b>                       |                      |                       |
| T3a vs. T1c                           | 2.16 (1.73-2.66) *** | 1.49 (1.12-1.94) *    |
| <b>Preoperative PSA-level (ng/μl)</b> |                      |                       |
| 4-10 vs. <4                           | 1.26 (1.12-1.42) **  | 1.33 (1.13-1.57) **   |
| 10-20 vs. 4-10                        | 2.08 (1.93-2.25) *** | 1.58 (1.42-1.75) ***  |
| >20 vs. 10-20                         | 1.95 (1.76-2.16) *** | 1.63 (1.42-1.86) ***  |
| <b>MAPT expression</b>                |                      |                       |
| Positive vs. negative                 | 1.78 (1.58-2.01) *** | 1.49 (1.29-1.70) ***  |
| Strong vs. negative                   | 2.68 (1.94-3.57) *** | -                     |

Confidence interval (95%) in brackets; asterisk indicate significance level: \*  $p \leq 0.05$ , \*\*  $p \leq 0.001$ , \*\*\*  $p \leq 0.0001$ .

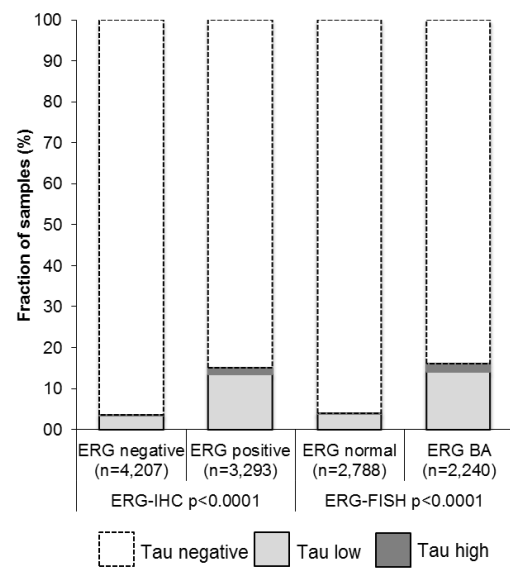

**Fig. S1** Association between positive microtubule-associated protein Tau (MAPT) staining and ERG status (IHC/FISH) in all cancers.
